# Supplementary material for: Unusual porous crystals via catenation of 1D ladders: unprecedented mixture effects on the adsorption of xylene isomers in a SCSC mode
Source: Royal Society of Chemistry journal article supplement (doi:10.1039/d0ce01458c), 2020-10-21
Supplement: d0ce01458c1.pdf [file d0ce01458c1.pdf]

<Electronic Supplementary Information>

**Unusual porous crystals via catenation of 1D ladders: unprecedented mixture effects on adsorption of xylene isomers in SCSC mode**

Soojin Lee, Dongwon Kim, In-Hyeok Park and Ok-Sang Jung\*

Department of Chemistry, Pusan National University, Busan 46241, Republic of Korea Fax: (+82) 51-5163522;

Tel: (+82) 51-5103240; E-mail: oksjung@pusan.ac.kr

Electronic Supplementary Information (ESI) available: Experimental details and crystal structure determination. TGA curves of [(2dioxane)@Ag(ClO<sub>4</sub>)L] and [(1.5o-X)@Ag(ClO<sub>4</sub>)L]; <sup>1</sup>H NMR spectra and IR spectra of Ligand, [(2dioxane)@Ag(ClO<sub>4</sub>)L], [(1.5p-X)@Ag(ClO<sub>4</sub>)L], [(1.5m-X)@Ag(ClO<sub>4</sub>)L] and [(1.5o-X)@Ag(ClO<sub>4</sub>)L]. CCDC reference numbers 2017538 and 2017539.

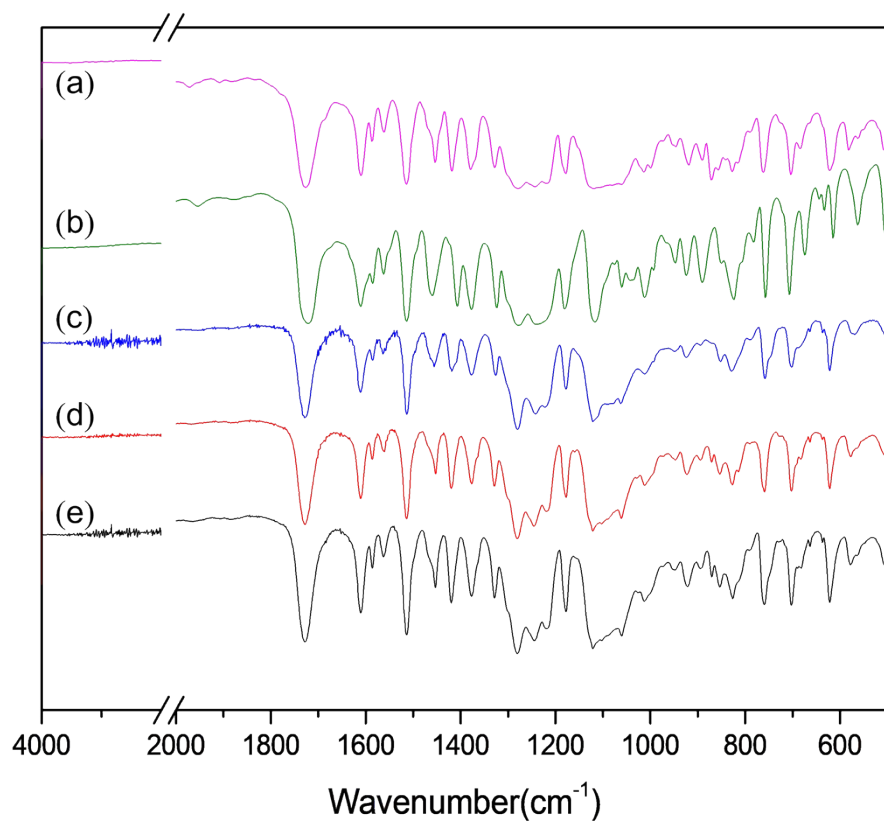

**Fig. S1** IR spectra of L (a), [(2dioxane)@Ag(ClO<sub>4</sub>)L] (b), [(1.5*p*-X)@Ag(ClO<sub>4</sub>)L] (c), [(1.5*m*-X)@Ag(ClO<sub>4</sub>)L] (d), [(1.5*o*-X)@Ag(ClO<sub>4</sub>)L] (e).

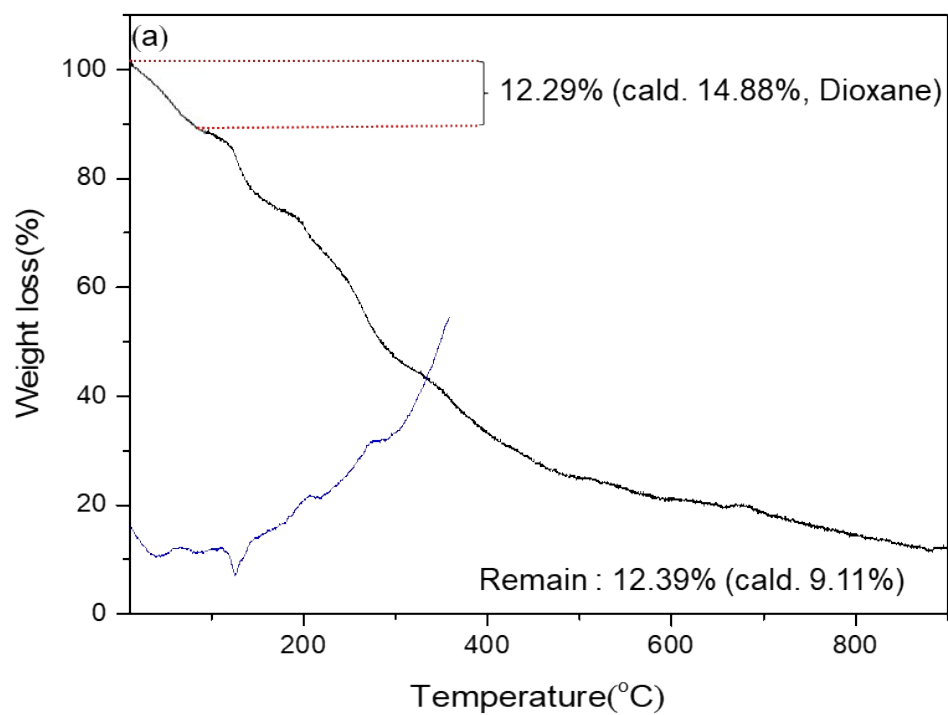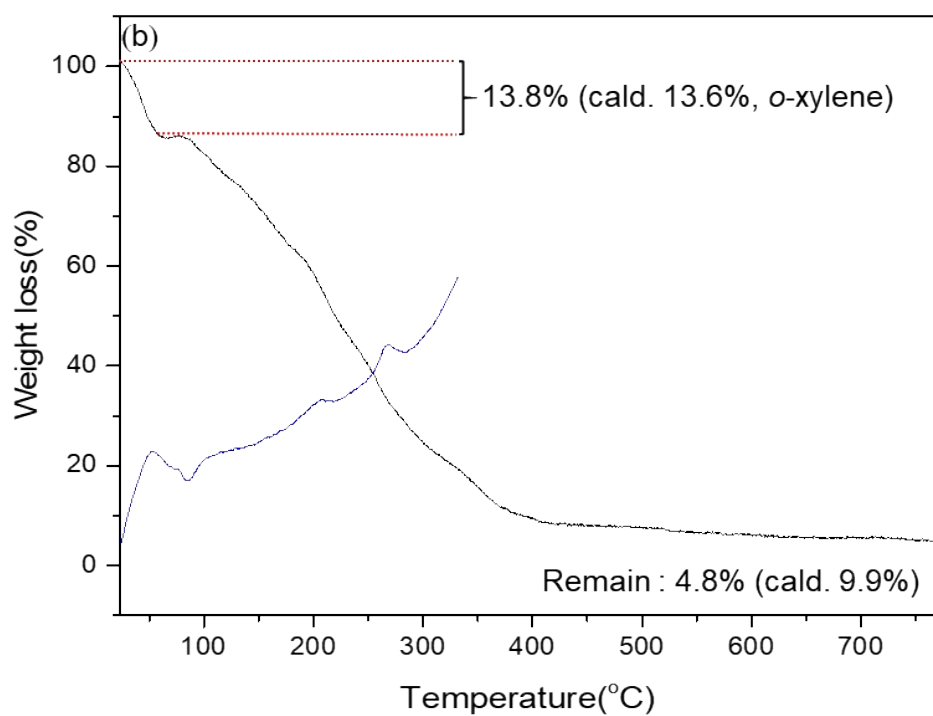

**Fig. S2** TGA and DSC overlays of [(2dioxane)@Ag(ClO<sub>4</sub>)L] (a) and [(1.5o-X)@Ag(ClO<sub>4</sub>)L] (b).

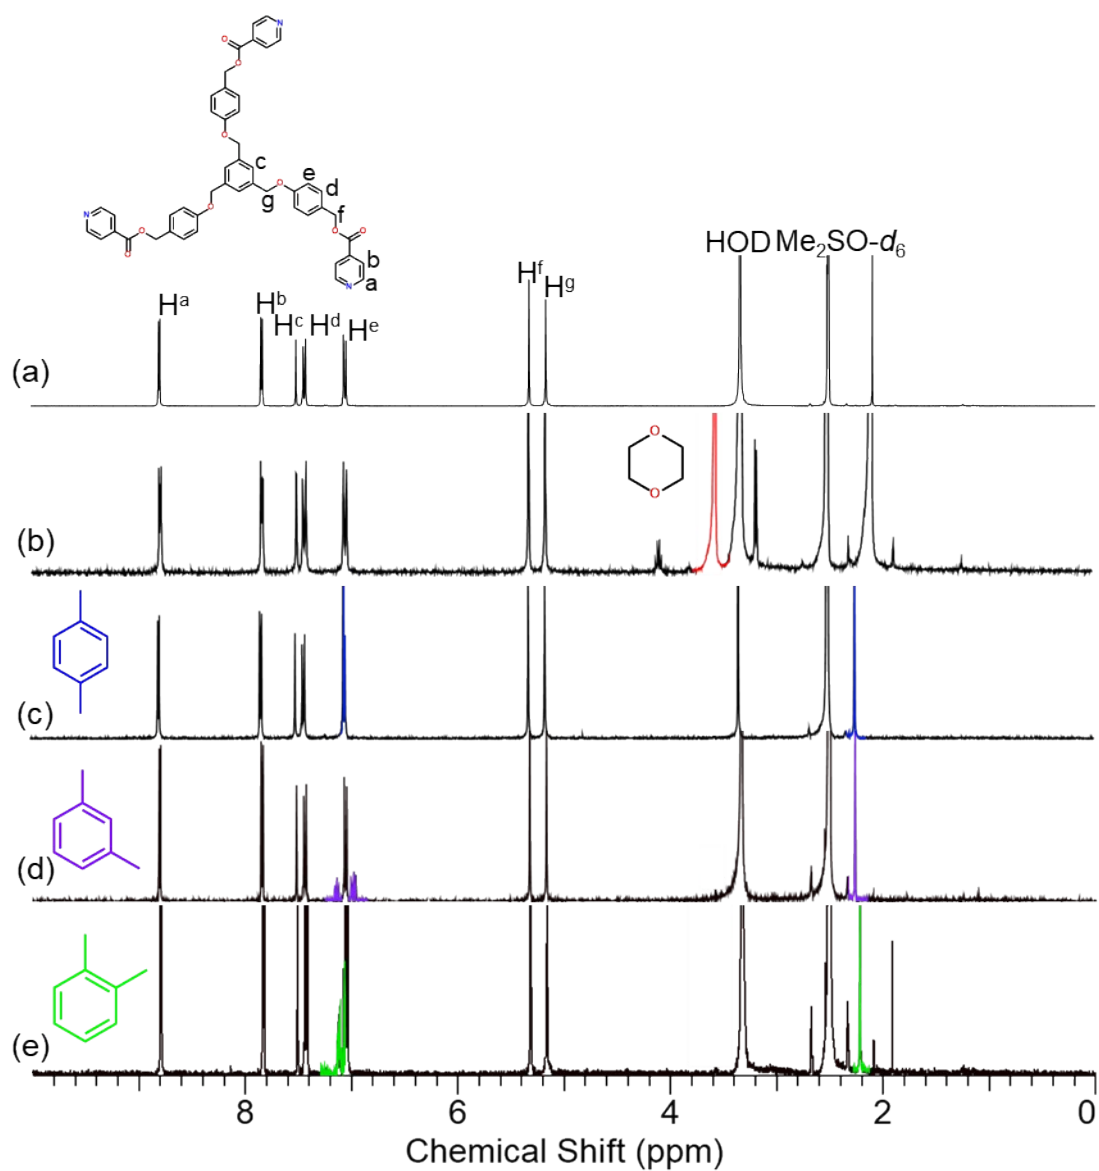

**Fig. S3**  $^1\text{H}$  NMR spectra of L (a),  $[(2\text{dioxane})@Ag(\text{ClO}_4)_2L]$  (b),  $[(1.5p\text{-X})@Ag(\text{ClO}_4)_2L]$  (c),  $[(1.5m\text{-X})@Ag(\text{ClO}_4)_2L]$  (d), and  $[(1.5o\text{-X})@Ag(\text{ClO}_4)_2L]$  (e).

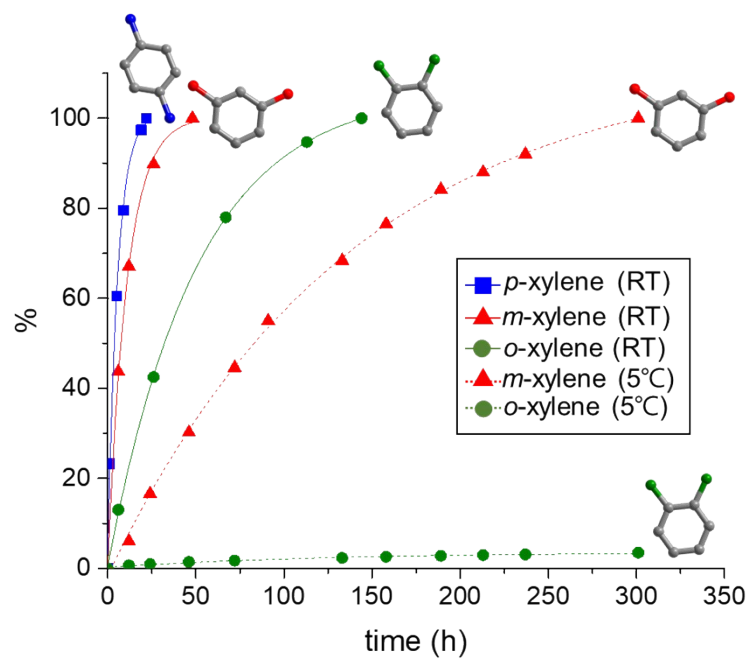

**Fig. S4** Adsorption of *p*-X, *m*-X, and *o*-X at room temperature and at 5 °C.

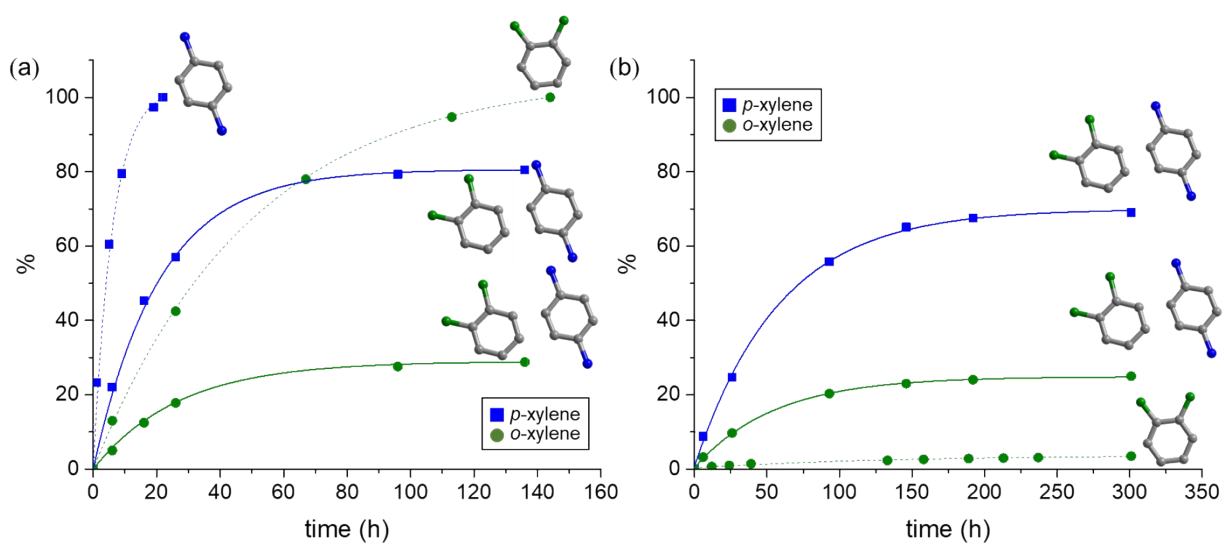

**Fig. S5** Exchange rate in the 1 : 1 mixture of *p*-X and *o*-X at room temperature (a) and 5 °C (b).

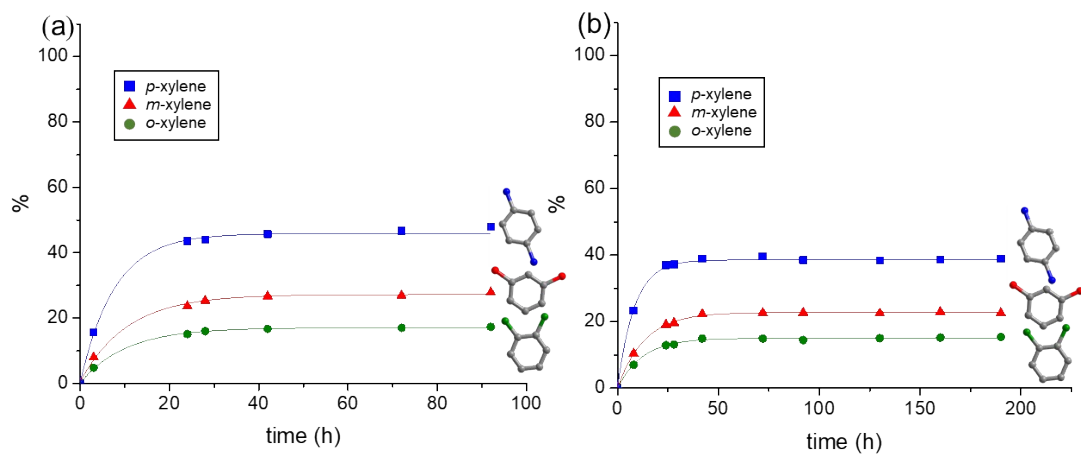

**Fig. S6** Exchange rate in the 1 : 1 : 1 mixture of *o*-X : *m*-X : *p*-X at room temperature (a) and at 5 °C (b).
